# Supplementary material for: Highly selective aerobic oxidation of alkyl arenes and alcohols: cobalt supported on natural hydroxyapatite nanocrystals
Source: Royal Society of Chemistry journal article supplement (doi:10.1039/c6ra04519g), 2016-01-01

*Supporting Information for*

**Highly Selective Aerobic Oxidation of Alkyl Arenes and  
Alcohols: Cobalt Supported on Natural Hydroxyapatite  
Nanocrystals**

Ahmad Shaabani,\* Shabnam Shaabani and Hadi Afaridoun

Department of Chemistry, Shahid Beheshti University, G. C., P. O. Box 19396-4716, Tehran,

Iran; Fax: +982122431671; E-mail: [a-shaabani@sbu.ac.ir](mailto:a-shaabani@sbu.ac.ir)

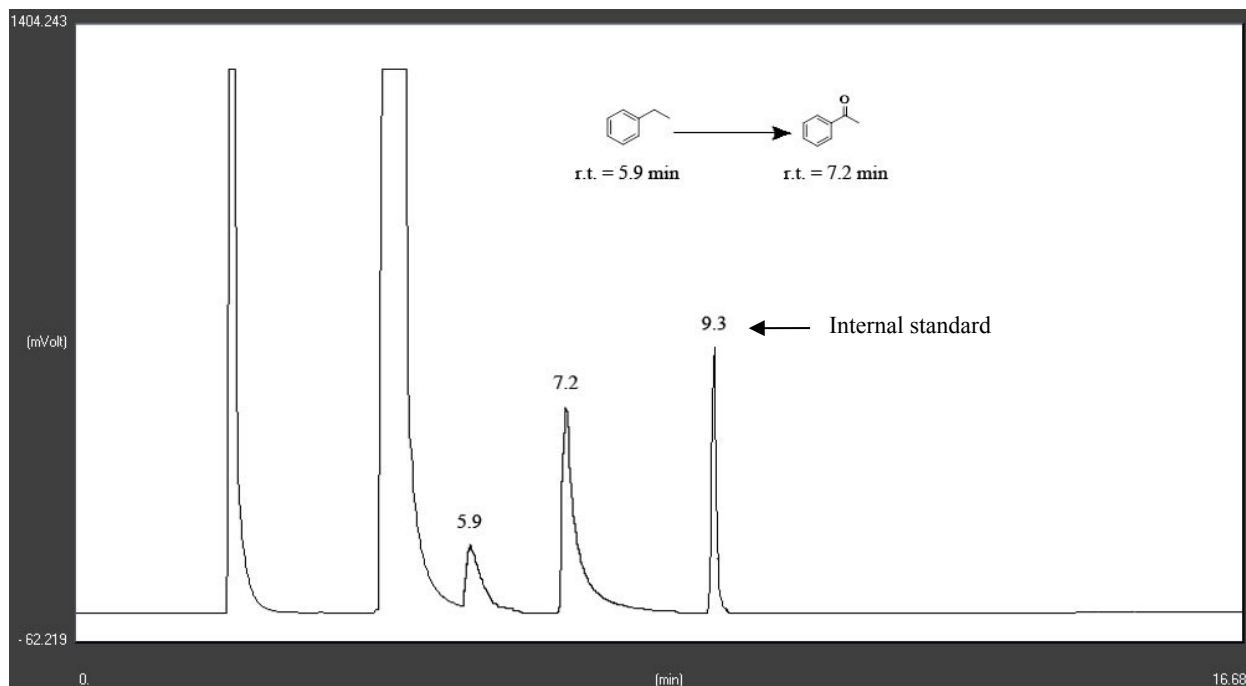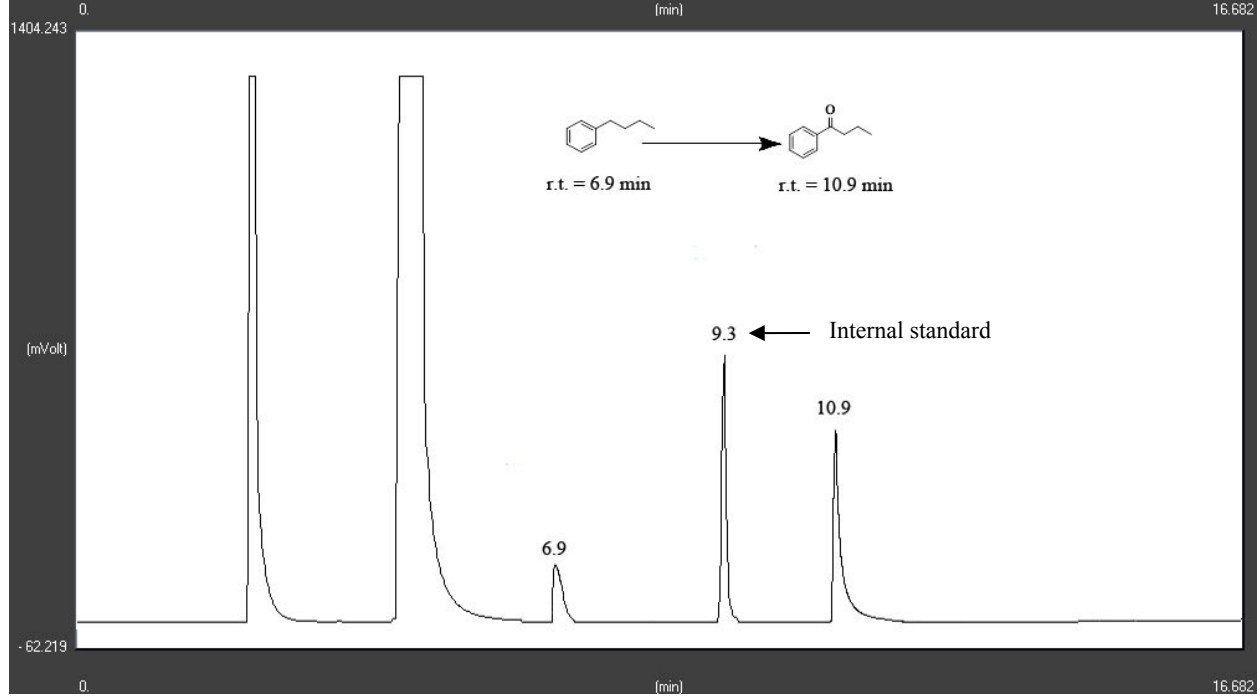

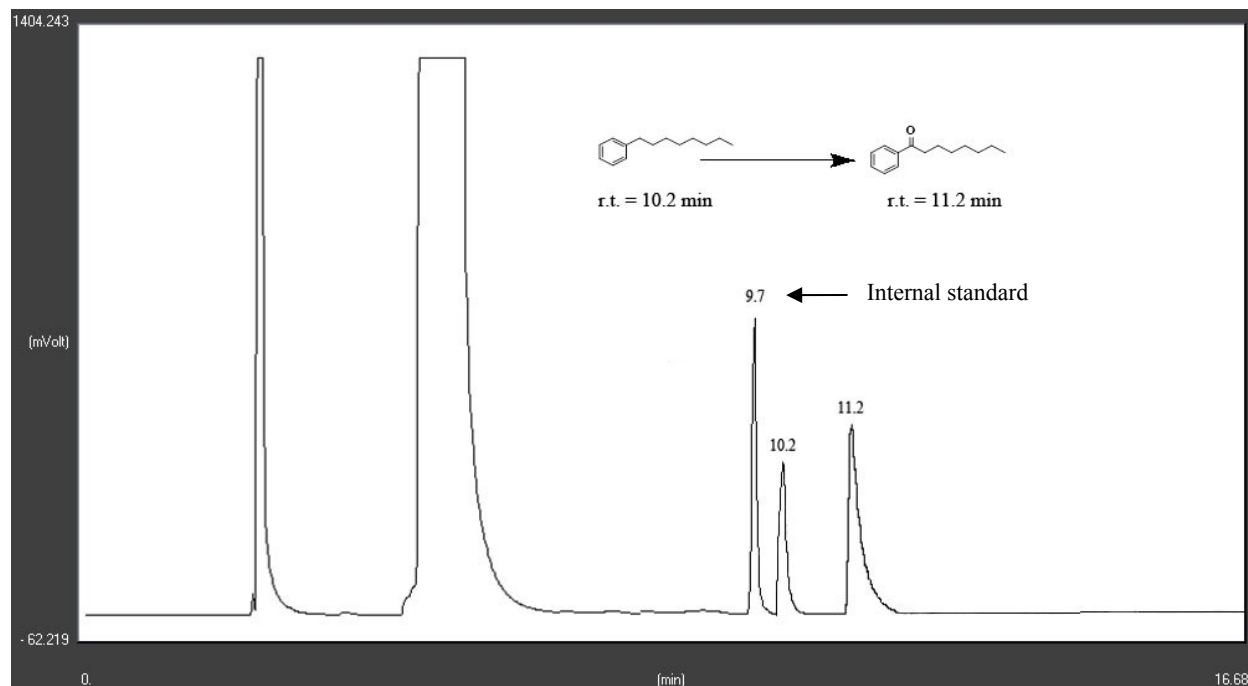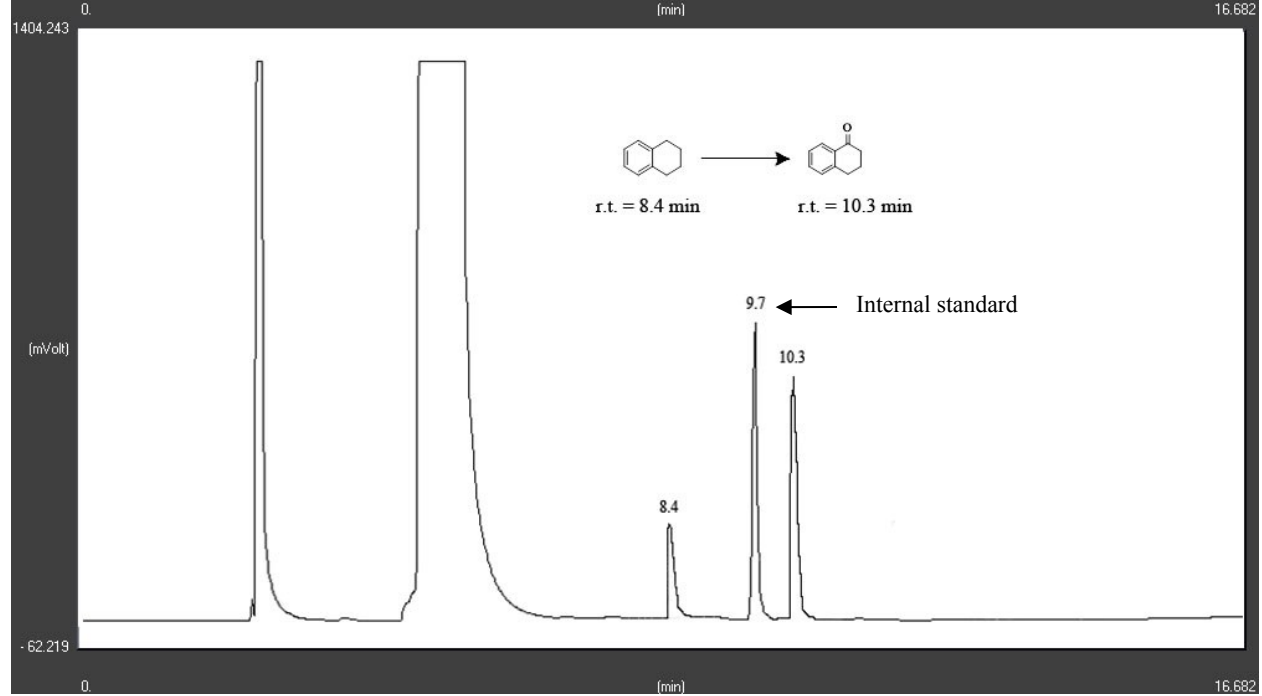

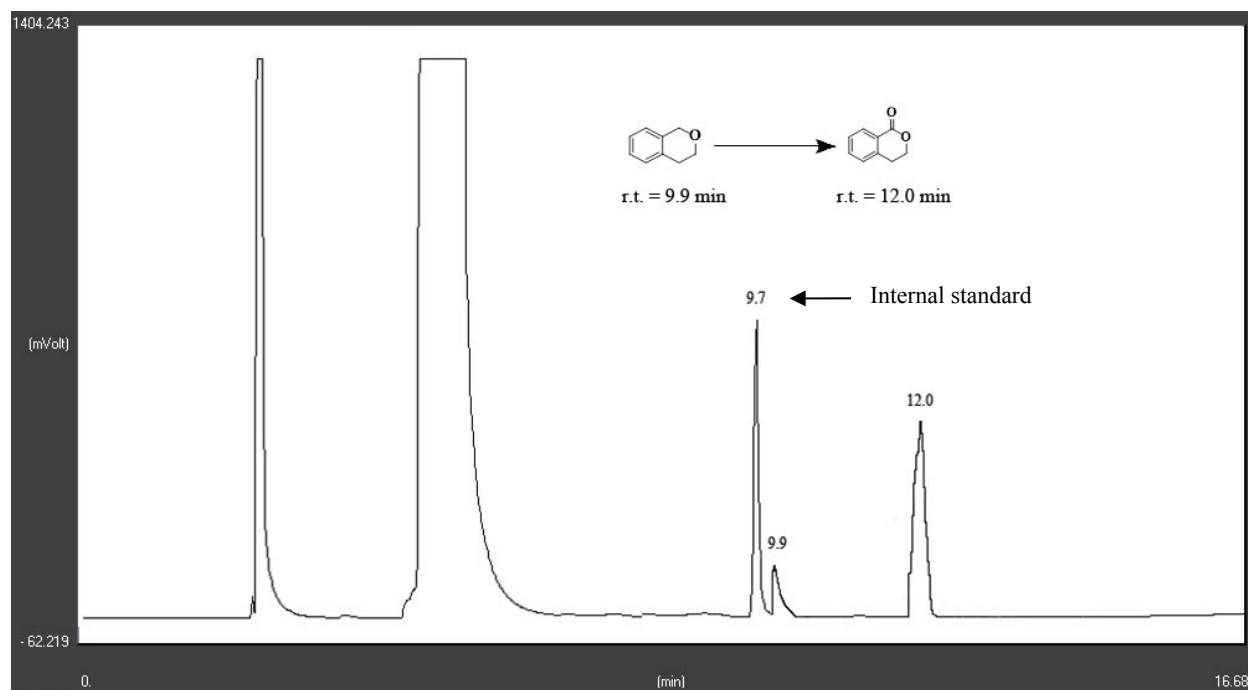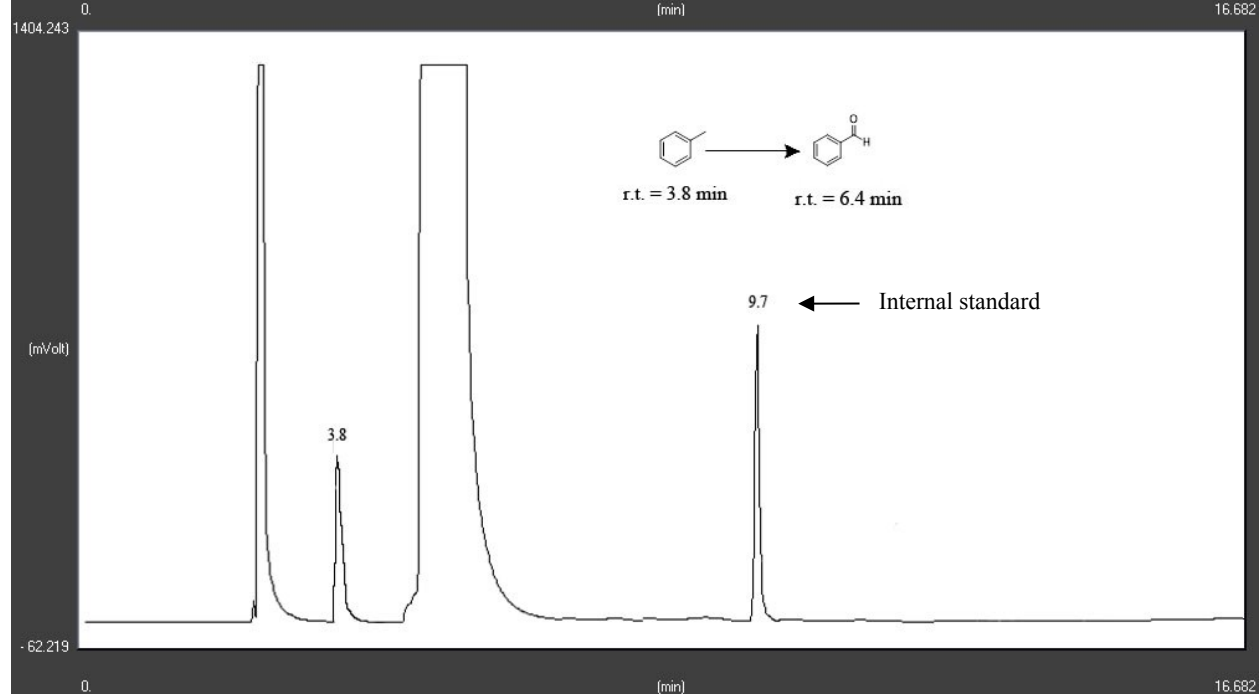

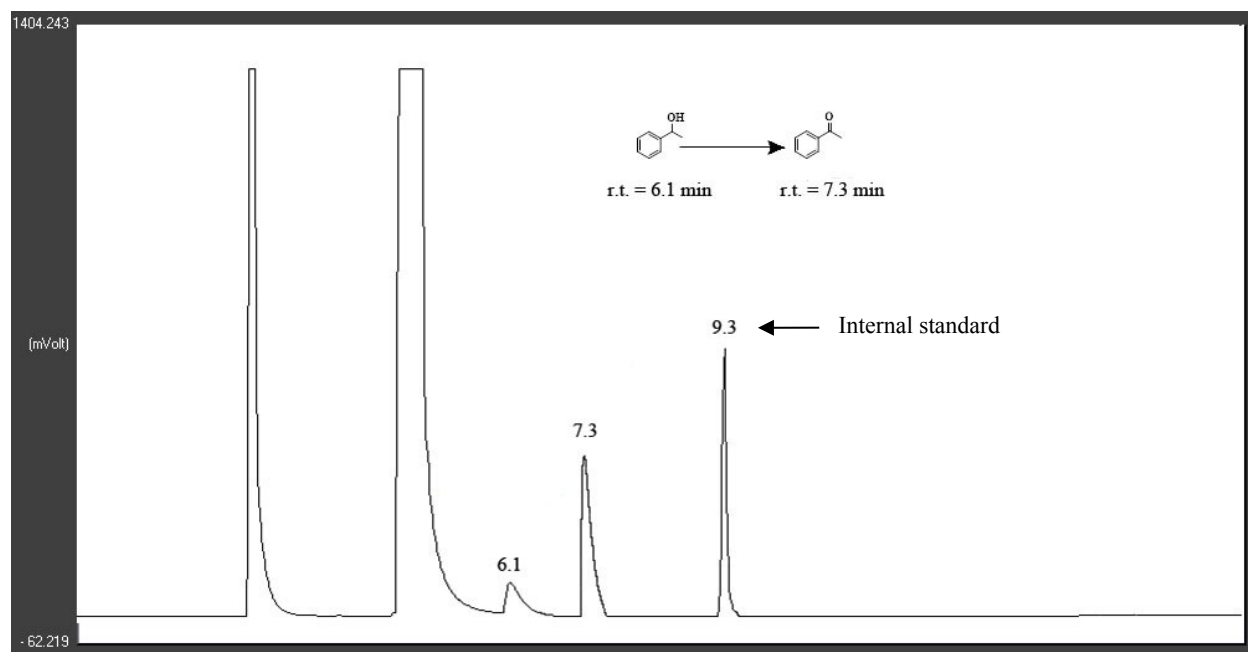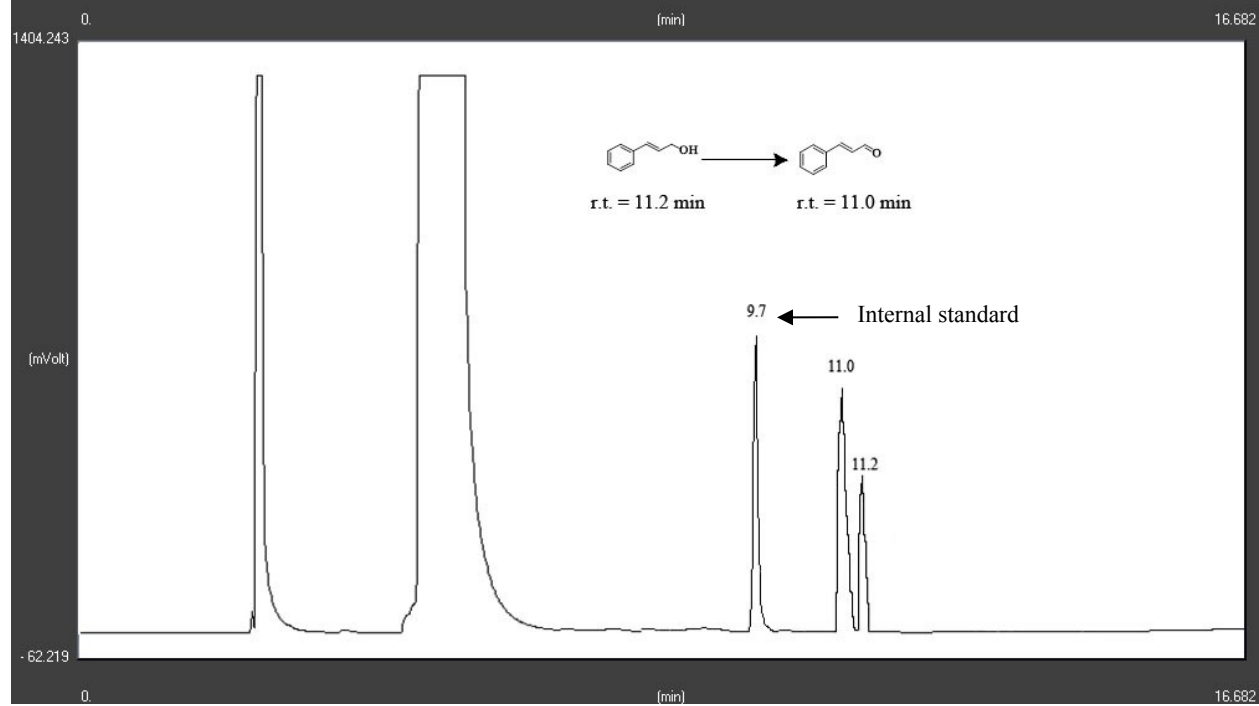

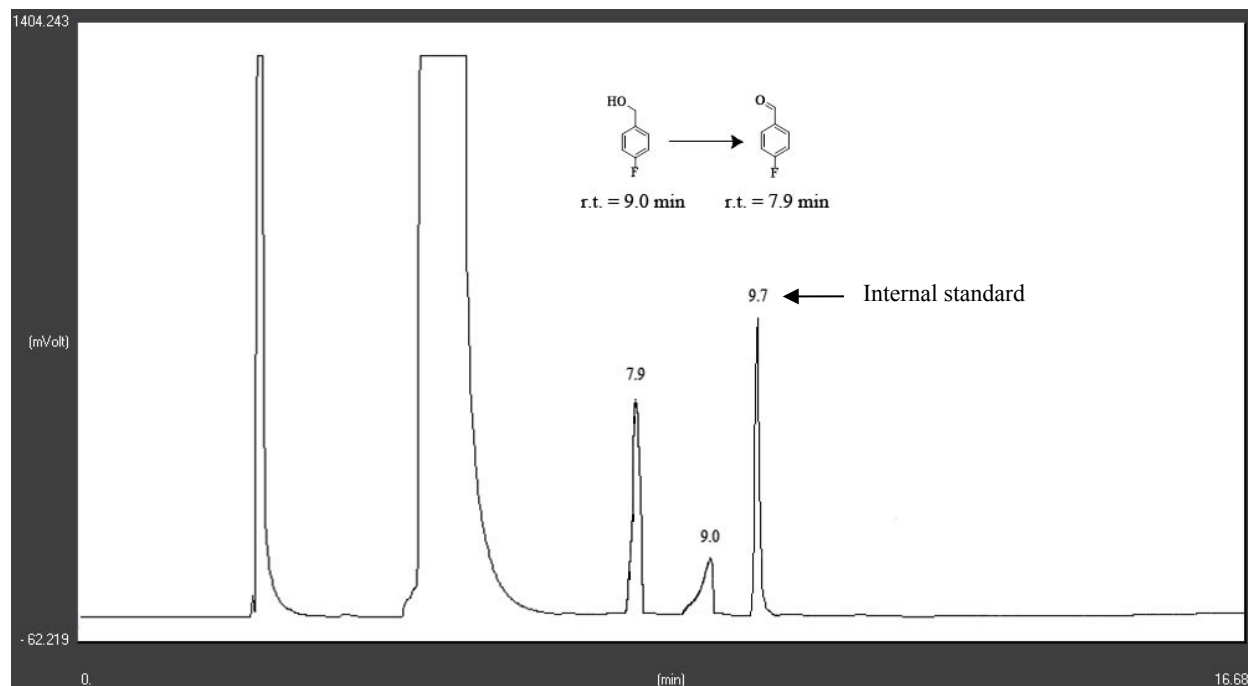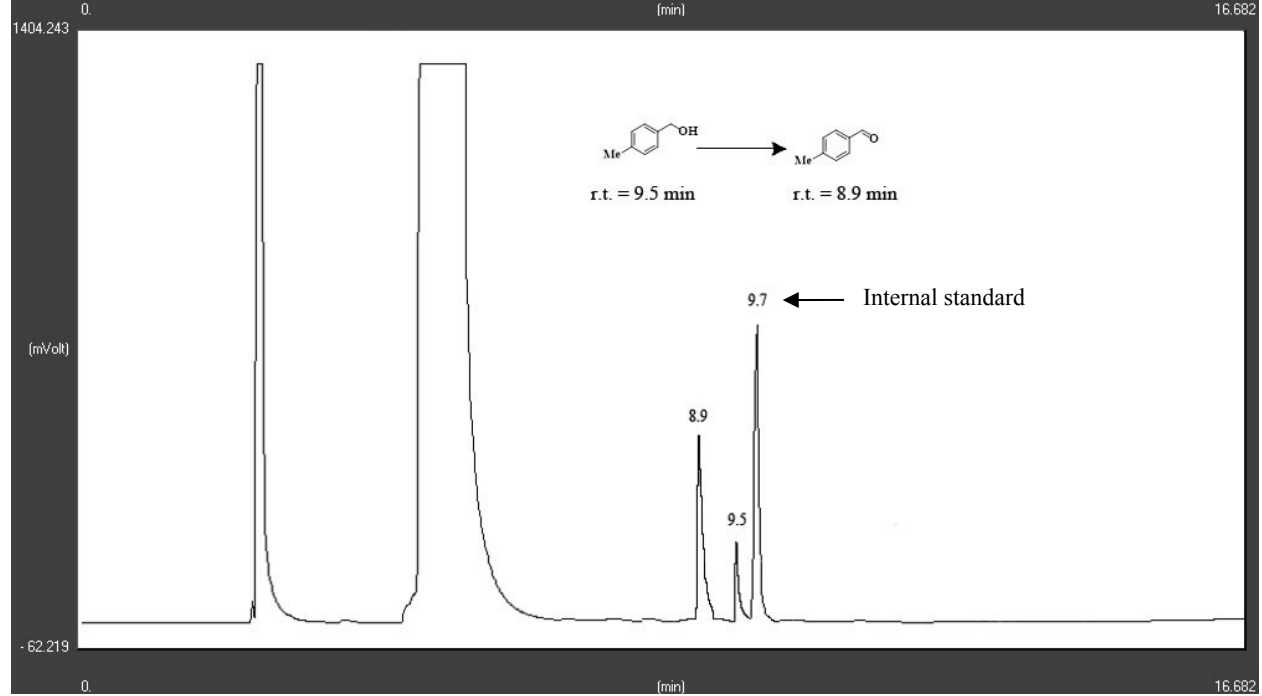

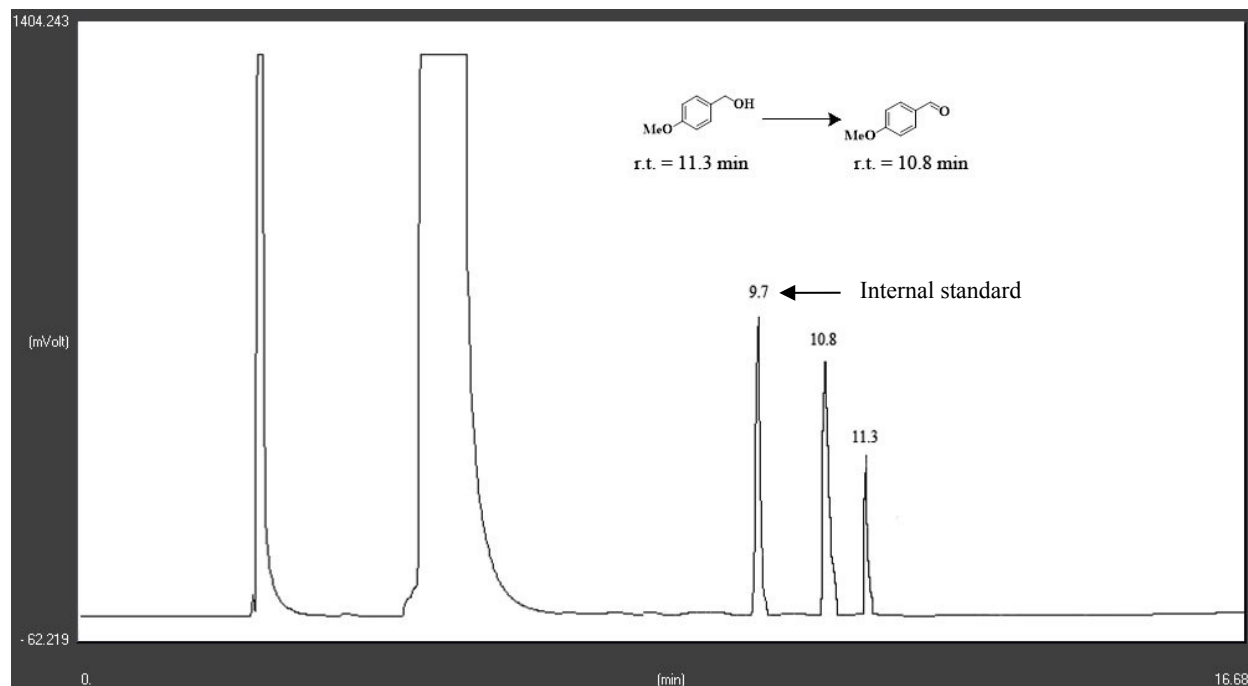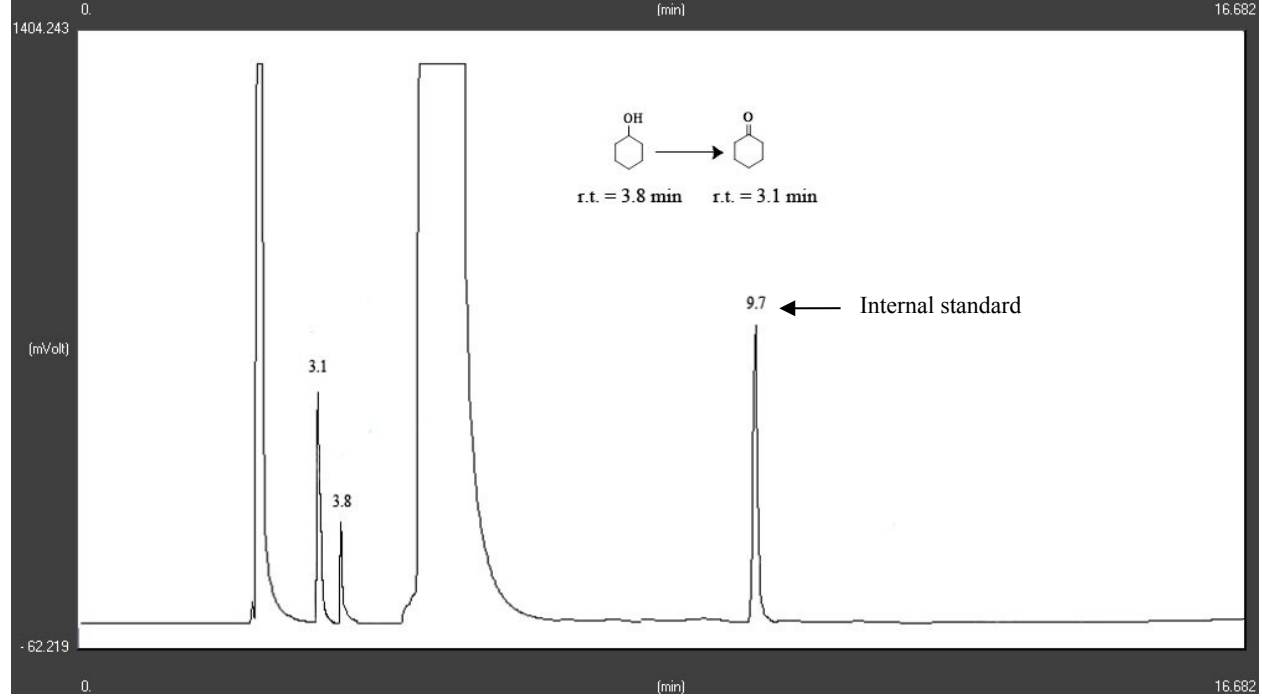

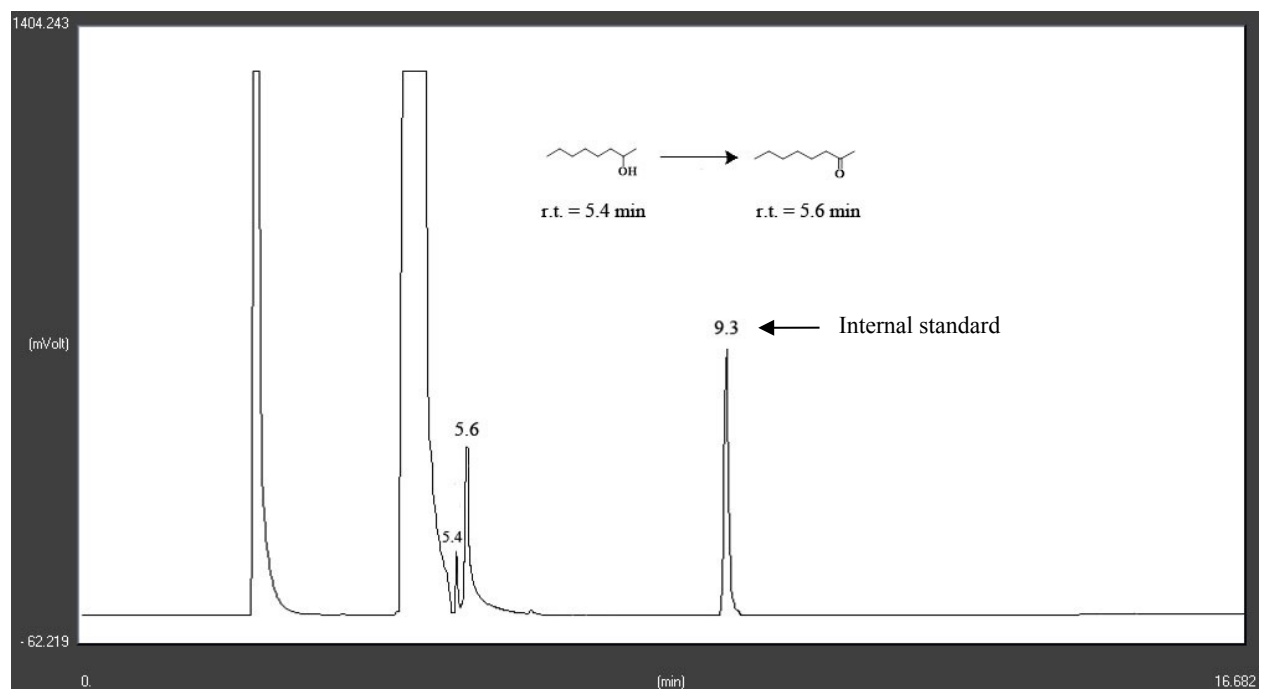

Supplement: c6ra04519g1.pdf [file c6ra04519g1.pdf]
